# Supplementary material for: MicroRNA‐34a‐5p Promotes Joint Destruction During Osteoarthritis
Source: PubMed Central journal article supplement — Arthritis Rheumatol. 2021 Feb 8;73(3):426–39. doi: 10.1002/art.41552 (PMC7986901; doi:10.1002/art.41552), 2021-02-08
Supplement: ART-73-426-s001.pdf [file ART-73-426-s001.pdf]

## **Supplementary Materials and Methods:**

### *MiR-34a-5p expression in human plasma*

Blood samples from total knee replacement (TKR) patients and healthy controls were collected in ethylenediaminetetraacetic acid dipotassium salt (K<sub>2</sub>-EDTA) containing tubes and centrifuged at 4000rpm for ten minutes at 4°C to obtain a plasma supernatant. Plasma was aliquoted into cryotubes, flash frozen in liquid nitrogen, and stored in a vapour liquid nitrogen tank until use. Samples were excluded if patients self-reported the following pre-existing conditions: high blood pressure, high cholesterol, lung disease, diabetes, ulcer, stomach disease, kidney disease, liver disease, blood disease, cancer, rheumatoid arthritis (RA), heart attack, coronary artery disease, stroke, thyroid problems, dementia, chronic neck pain, or chronic pelvic pain. This ensured that our analysis was not confounded by these pre-existing conditions since healthy control volunteers did not report any of the above conditions.

Isolation and purification of RNA from plasma (n=37 TKR; n=34 healthy controls) was performed using the miRCURY RNA Isolation Kit– Biofluids (#300112, Exiqon) following manufacturer's instructions. From 200µl of human plasma, ten nanograms of RNA was used for reverse transcription using the miRCURY LNA Universal RT microRNA PCR (#203301, Exiqon) system for quantification of miR-34a-5p.

### *Total RNA extraction from human knee articular cartilage and human synovium*

Late-stage radiographic knee OA articular cartilage (n=11) and synovium (n=7) used for RT-qPCR analysis were obtained from patients undergoing total knee replacement (TKR; KL III/IV), while early radiographic knee osteoarthritis (OA; KL 0/I) synovium (n=7) was obtained from patients undergoing joint arthroscopy. Normal articular cartilage samples used as controls (n=8) were

obtained from cadavers with no history of arthritis, joint injury, joint trauma or surgery, no prescription anti-inflammatory medications, no co-morbidities,  $\geq 18$  years old, and were harvested within 4 hours of death (University of Calgary; REB 15-0005). 200 mg of snap frozen tissue was crushed in liquid nitrogen using a Cellcrusher tissue pulverizer (Cellcrusher). The barrel and ball were precooled in liquid nitrogen immediately prior to crushing. 500  $\mu$ l of TRIzol reagent (#15596026, Invitrogen) was added to further homogenize the cartilage on wet ice using the Vibra Cell sonicator (Model VC50, Sonics and Materials Inc.). Synovial tissue was homogenized on ice using a Polytron PT 2100 benchtop homogenizer (Kinematica AG). RNA was purified using a RNeasy Mini kit (#74104, Qiagen) according to manufacturer's instructions. RNA was quantified using Nano-Drop 1000 (Thermo Scientific). RNA was reverse-transcribed and miR-34a-5p expression was determined using RT-qPCR as described in "*Total RNA extraction from cells and Quantitative Reverse Transcription Polymerase Chain Reaction (RT-qPCR)*" (see below).

#### *Destabilization of Medial Meniscus (DMM) surgery*

C57BL/6J mice (Jackson Laboratories, USA) were bred and housed in a  $21 \pm 1^\circ\text{C}$  controlled room under a 12-hour light-dark cycle at the Krembil Research Institute animal facility. Animal access to food and water was ad-libitum. Ten-week-old C57BL/6J and 19-week-old high-fat diet (HFD)-fed C57BL/6J male mice were subjected to destabilization of the medial meniscus (DMM) surgery in the right knee as previously described [1]. All animal studies were performed according to relevant guidelines and regulations approved by the UHN's animal care committee (Animal Use Protocol #3729). As experimental controls, mice were subjected to sham surgery whereby the joint capsule was opened and the medial meniscotibial ligament was exposed but not transected.

### *In-situ hybridization*

Mouse knee joints were harvested and fixed in 4% paraformaldehyde (n=3 four weeks, n=4 ten weeks post-Sham; n=3 four weeks, n=4 ten weeks post-DMM), while human cartilage from TKR patients (n=4 non-degenerated; n=4 degenerated) was fixed in neutral buffered formalin (NBF) for 48 h and decalcified in 10% EDTA (RNase-free) for two to three weeks at 4°C. Non-degenerated cartilage was obtained from the lateral femoral condyle of TKR patients that were microscopically determined as undamaged and used as controls. Joints sections were cut as described below for histology using RNase-free water. Slides were kept at 4°C until use. ISH was performed using the miRCURY LNA™ microRNA ISH Optimization Kit (FFPE) (#90000, Exiqon) according to manufacturer's instructions. Probes used were LNA microRNA-34a-5p double DIG-labeled (25 μM; final probe concentration 160 nM), LNA Scramble-miR probe, double-DIG labeled (negative control; 25 μM; final probe concentration 40nM), and LNA U6 snRNA probe, 5' DIG-labeled (positive control; 0.5 μM; final probe concentration 1 nM). Nuclei were counterstained with Nuclear Fast Red (#H-3403; Vector laboratories). Cytoplasmic blue staining indicates positive probe binding. The average percentage of positive cells for mouse cartilage, synovium and meniscus, and human cartilage, was determined by two independent reviewers in a blinded fashion from three distinct regions of each section.

### *Chondrocyte and fibroblast-like synoviocyte (FLS) treatment with miR-34a-5p mimic or antisense oligonucleotide (ASO)*

Human OA chondrocytes and FLS were isolated by enzymatic digestion from cartilage and synovial tissue obtained from patients undergoing TKR at Toronto Western Hospital as previously described [2, 3]. Only first-passage chondrocytes were used for experiments while passage three

FLS were used. Cells were cultured in Dulbecco's Modified Eagle's Medium (DMEM) supplemented with 10% Fetal Bovine Serum (FBS), 100 U/ml penicillin and 100 µg/ml streptomycin under 5% atmospheric CO<sub>2</sub>. Cells were transfected in suspension with 100 nM hsa-miR-34a-5p *mirVana* miRNA mimic (#4464066, Invitrogen), negative control mimic (cel-miR-39-3p; #479902-001, Exiqon), hsa-miR-34a-5p *mirVana* miRNA inhibitor (ASO; #4464084, Invitrogen), or miRCURY LNA Power Inhibitor Control (Negative control A, #199006-101, Exiqon) for 24 h using Lipofectamine<sup>TM</sup> RNAiMAX transfection reagent (#13778075, Invitrogen, USA) according to manufacturer's instructions. The hsa-miR-34a-5p *mirVana* miRNA mimic is a chemically modified double-stranded RNA that mimics endogenous, mature miR-34a-5p activity with high specificity due to inactivation of the passenger miRNA star strand, while the hsa-miR-34a-5p *mirVana* miRNA inhibitor (ASO) is a chemically modified single-stranded RNA ASO that specifically binds to and reduces endogenous miR-34a-5p transcript levels [4]. The control oligonucleotide (*mirVana*<sup>TM</sup> miRNA mimic Negative Control or miRCURY LNA Power Inhibitor Control) is uniquely designed to have no known human, mouse, or rat gene targets.

*Total RNA extraction from cells and Quantitative Reverse Transcription Polymerase Chain Reaction (RT-qPCR)*

Total RNA was extracted from human OA chondrocytes or FLS using TRIzol reagent, and GlycoBlue co-precipitant (15 mg/ml) (#AM9516, Invitrogen) for miRNA enrichment. After RNA quantification, 600 ng of mRNA was converted to cDNA using a QuantiTect Reverse Transcription PCR Kit (#205313, Qiagen) according to manufacturer's instructions. Diluted (5x) cDNA was used for RT-qPCR reactions in 96-well plates (#HSR9905, Biorad) using Sso Advanced Universal SYBR Green Supermix (#1725274, Biorad) according to manufacturer's

instructions. Primer specificity was confirmed by performing melting curve analysis on a Roche LightCycler 480 II real-time PCR system. GAPDH was used as an endogenous reference gene. OA phenotypic markers investigated were *ACAN*, *COL2A1*, *ADAMTS5*, *MMP13*, *COL10A1*, *COL1A1*, *IL1B*, *ULK1*, *ATG3*, *ATG5*, *ACTA2*, *TGFB*, *TNF*, and *IL6*.

For miRNA, ten nanograms of total RNA was reverse transcribed using a Universal cDNA synthesis kit II (#203301, Exiqon) and PCR reactions were run using ExiLENT SYBR Green master mix (#203421, Exiqon) according to manufacturer's instructions. MiR-24-3p was used as an endogenous reference gene since its expression remained consistent across different tissues, as well as plasma from humans and mice compared to other housekeeping genes that were tested. Relative gene/miRNA expressions were calculated by the  $2^{-\Delta C_t}$  method. cDNA samples were excluded if GAPDH/miR-24 cycle threshold values ( $C_t$ ) varied by more than 2 cycles.

#### *Mouse intra-articular miR-34a-5p mimic knee injections*

Ten-week-old C57BL/6J male mice were anesthetized with isoflurane and 5  $\mu$ g (in 3  $\mu$ l) of in-vivo ready miRCURY locked nucleic acid (LNA)<sup>TM</sup> microRNA Mimic (mmu-miR-34a-5p; #479996-601, Exiqon) was injected intra-articularly using a 33G needle (#80308, Hamilton) into the right knees (n=8). Left knees were injected with 5  $\mu$ g Negative Control miRCURY LNA miRNA Mimic (#YM00479902, Exiqon; n=8). Joints were collected eight weeks post-injection for histopathological assessments.

### *MiR-34a-5p expression in obese vs. non-obese total knee replacement (TKR) patients*

According to their body mass index (BMI), TKR patients were stratified into obese (BMI  $\geq$  30; n=22) and non-obese (BMI = 18.9-29.9; n=29) groups. Relative expression levels of plasma miR-34a-5p, as quantified by qRT-PCR, were compared between both groups.

### *Mouse high-fat diet (HFD) regime*

Male mice were fed a normal chow diet (5.8% fat by weight, Harlan, Teklad, LM-485) from birth until ten weeks of age (n=44). At ten weeks of age (baseline), mice were placed on a HFD (34.3% fat by weight, Harlan, TD 06414; n=19) for up to 18 weeks to induce obesity. This diet-induced model of obesity was previously characterized using dual-energy X-ray absorptiometry (DEXA) scanning to assess parameters such as body fat percentage and body area, fasting blood glucose levels, and insulin levels in HFD mice compared to LD mice [5]. Mice were placed on a lean diet (LD; 4.2% fat by weight, Harlan, TD 06416; n=25) for 18 weeks as controls. 18 week HFD-fed (n=3) and 18 week LD-fed (n=3) mouse knee joints were subjected to ISH as described above for miR-34a-5p detection and quantification. Mice were weighed at baseline and at the end of HFD or LD using a digital weighing machine (Ohaus Corporation, CS 200). DEXA scanning (tube peak potential: 80, 100, 140 kVp, Discovery A, Hologic) was used for whole body composition analysis as previously reported [5].

### *Mouse plasma collection and blood glucose measurement*

Mouse cages were placed under a heat lamp for approximately 10 minutes to promote vasodilation and facilitate blood collection. Approximately 200  $\mu$ l of blood was collected (baseline or end of HFD/LD) from the saphenous vein of non-anesthetized mice into EDTA K<sup>+</sup> coated microvettes

(Sarstedt). Blood collection site was then treated topically with antibiotic ointment (Polysporin). Plasma was separated by centrifugation at 10,000 rcf at 4°C. For miR-34a-5p quantification in plasma, 10 ng of RNA from 50 µl of mouse plasma was reverse transcribed using the miRCURY LNA Universal RT microRNA PCR (#203301, Exiqon) system. Levels of miR-34a-5p were analyzed by miRNA qRT-PCR as described above (“*Total RNA extraction from cells and Quantitative Reverse Transcription Polymerase Chain Reaction [qRT-PCR]*”). In order to measure fasting blood glucose levels, mice were fasted for six hours and blood glucose was measured from tail vein blood samples at ten weeks old [baseline; (n=5)] and at the end of nine weeks of HFD (n=5) with a one-touch glucose meter (Accu-chek Aviva, Roche).

*High-fat diet (HFD) mice subjected to DMM surgery and intra-articular miR-34a-5p inhibitor (LNA-ASO) injections*

Two experiments involving HFD-fed mice were performed. First, ten-week-old C57BL/6J male mice were placed on a HFD for 18 weeks. After 18 weeks of HFD (28 weeks of age), mice were subjected to DMM surgery followed by three bi-weekly intra-articular injections of 5 µg of miR-34a-5p LNA ASO (n=5) or control oligonucleotide (n=5) (i.e. weeks two, four, and six post-DMM surgery). The LNA modification of the ASO enables increased sensitivity, specificity, and in vivo stability [6]. Joints were collected ten weeks post-DMM surgery for histopathological assessments. Second, ten-week-old C57BL/6 mice were fed a HFD for nine weeks. 19-week-old mice were then subjected to DMM surgery followed by three weekly injections of 5 µg of miR-34a-5p LNA ASO (n=6) or control oligonucleotide (n=5) (i.e. weeks two, three, and four post-DMM surgery). Joints were then collected five weeks post-DMM surgery for histopathological assessments.

*Histology and immunohistochemistry*

Mouse knee joints were isolated and fixed for 48 h in 10% NBF at room temperature. Knee joints were decalcified in rapid decalcifier solution (RDO solution; Apex Engineering Products Corporation) for 1 h 45 min, washed three times with double distilled water and paraffin-embedded. Sections (5  $\mu\text{m}$ ) were dried at 40 °C for 24 h. Human knee OA cartilage was obtained from patients undergoing TKR surgery (KL III/IV), fixed in 10% NBF for 48 h, decalcified in RDO for approximately 3 h, and processed for histology as previously reported [7] . The sections were then de-paraffinized, rehydrated and stained with Safranin-O/Fast green (Sigma-Aldrich) according to the manufacturer's instructions. The OARSI scoring method for mice was used to analyze and score knee joint sections by two independent, blinded reviewers [8]. Average of scores from two independent reviewers is reported. To evaluate the degree of synovitis, sections were stained with Masson's trichrome (Sigma-Aldrich) as previously reported [9]. Sections were then scored by two scorers in a blinded fashion on a scale from 0 to 3 considering ECM deposition, cell number, and tissue thickness: 0, no synovitis; 1, mild synovitis; 2, moderate synovitis; and 3, severe synovitis. Chondrocyte cellularity above the tidemark was counted in three areas along the tibial plateau and the average cellularity per area was quantified by two independent, blinded reviewers.

Formalin-fixed, paraffin-embedded mouse knee joint sections from the medial aspect of the knee were deparaffinized in xylene and rehydrated in a graded series of alcohol washes (100%, 95%, 70%, and 50% ethanol). Slides were incubated in 10 mM sodium citrate buffer (pH 6.0) at 60°C for three hours for antigen retrieval. Sections were incubated with Dual Endogenous Enzyme Block (#S2003, Dako) for 30 minutes to block endogenous peroxidase activity. Sections were blocked with 1% BSA for 30 minutes and incubated overnight at 4°C with MMP-13 (1:50; #ab39012; Abcam), C1,2C (Col 2 3/4C<sub>short</sub>; 1:250; #50-1035; IBEX Pharmaceuticals Inc.),



Cleaved Caspase-3 (Asp175) (1:100) (9661S; Cell signaling Technology), or anti-poly (ADP-ribose) polymerase (PARP) p85 fragment pAb (1:50; G734A; Promega). After two water washes, sections were incubated with rabbit or mouse biotinylated secondary antibodies for 30 min. Signal was amplified with horseradish peroxidase (HRP) conjugated to streptavidin using Vectastain Elite ABC kit (#PK-6100; Vector Laboratories) and developed with DAB peroxidase (HRP) Substrate Kit with nickel (#SK-4100; Vector Laboratories) according to manufacturer's instructions. Tissue sections were counterstained with eosin Y (#E511-25; Fisher Scientific), dehydrated using a graded series of alcohol washes and xylene, and mounted with Permount (#SP15-500; Fisher Scientific). Total cells and cells with positive staining were counted in three separate fields to determine the average percentage of chondrocytes positive for individual antigens in the tibial plateau and femoral condyle. The presence of extracellular matrix breakdown products was visualized by the degree of C1,2C staining in the extracellular matrix.

#### *MiR-34a knock-out (KO) mice*

Heterozygous constitutive miR-34a-KO mice were purchased from Taconic Biosciences (#9743; Material Transfer Agreement UHN Ref# 2016-0861). Briefly, the targeting vector was generated using C57BL/6J DNA and transfected into C57BL/6NTac embryonic stem cells. The miR-34a sequence is flanked by LoxP sites. The constitutive KO allele was generated after Cre-mediated recombination by crossing chimeras to a Cre-expressing mouse on a C57BL/6 background. The constitutive KO line was subsequently backcrossed to C57BL/6NTac animals for at least two generations and the Cre-transgene was removed by segregation (supplementary Fig. S5A).

Heterozygous mice (Cre<sup>KO</sup>/miR34a<sup>+</sup>) were bred in-house and offspring were genotyped to identify homozygous KO (Cre<sup>KO</sup>/miR34a<sup>-</sup>) and wild-types (WT) (Cre/ miR34a<sup>+</sup>) mice. MiR-34a

homozygous KO mice were fertile and born in the expected Mendelian ratios without any overt developmental phenotypes. A more extensive characterization investigating approximately 300 physiological parameters of homozygous miR-34a-KO mice have been previously reported with no major phenotypic abnormalities compared to WT littermates [10]. Primers were designed to amplify CRE [deleted null (KO; 216 bp) or CRE WT (1824 bp)] or miR-34a alleles (222 bp). CRE primer sequence (5' to 3'): Forward TGCCCTGAAGTGAAGAGTACC; Reverse CCCAAACTCATTATGTAGTCAGG. MiR-34a primer sequence (5' to 3'): Forward CCGAGGACACAGGACATAGC; Reverse CCCAAACTCATTATGTAGTCAGG. Both primers are combined to determine zygosity.

#### *Isolation and Culture of Mouse Articular Chondrocytes*

WT and KO female mice were euthanized at five-weeks-old and articular cartilage was scraped from the knees (both tibial plateau and femoral condyle surfaces) and both hips (femoral head) using a scalpel and collected in sterile cold 1x PBS on ice. Primary chondrocytes were isolated according to protocol 3.3 in the text book Osteoporosis and Osteoarthritis [11]. Cartilage pieces were washed three times in cold 1x PBS. PBS was decanted and 15 ml of 3 mg/ml Collagenase from *Clostridium histolyticum* (#C0130-100MG, Sigma-Aldrich) solution was added to the cartilage pieces, poured into a sterile petri dish and incubated at 37°C in a cell culture incubator overnight. Cartilage pieces were pipetted up and down to release the cells, strained (70 µm cell strainer), and cells were centrifuged at 1500 x g for 5 minutes. Cells were washed with DMEM (supplemented with 10% FBS, 1% penicillin-streptomycin), pelleted and resuspended. Cells were counted then plated in 6-well plates and cultured for approximately ten days or until confluent.

Total RNA was extracted from first passage KO and WT mouse chondrocytes as described above, for qRT-PCR analysis of *Col2a1* and *Acan*.

#### *Preparation of RNA sequencing Libraries*

Total RNA extracted from cultured mouse chondrocytes was quantified using the Qubit RNA BR assay (ThermoFisher) on the Denovix DS-11 spectrophotometer (Denovix, Wilmington). RNA quality was assessed using the RNA nano chips on a Bioanalyzer instrument (Agilent, Santa Clara). RNA integrity numbers (RIN) for all samples were > 9.7. Sample libraries were prepared using TruSeq Stranded Total RNA with RiboZero following the low sample protocol as per manufacturer's recommendations (Illumina). Briefly, ribosomal RNA was first removed from 200 ng of total RNA. Remaining RNA was purified using a Agencourt RNAClean XP kit (Beckman Coulter), fragmented and reverse transcribed. The resulting cDNA was adenylated at the 3' ends, to which adapters were then ligated, which barcoded the samples enabling multiplexing and facilitated binding to the flow cell for sequencing. The modified cDNA was enriched using a Agencourt AMPure XP kit (Beckman Coulter), amplified by 15 cycles of PCR, and enriched once more. Library quality was assessed on a high sensitivity DNA chip on the Bioanalyzer (Agilent) and quantified using a KAPA Library Quantification Kit for Illumina platforms (Roche). Six libraries prepared from three biological samples for both WT and miR-34a-KO mice were diluted to 10 nM and volumetrically pooled. Pooled library sample was quantified using high sensitivity dsDNA assay (Denovix), diluted to 4 nM, denatured with 0.2N sodium hydroxide for 5 minutes and neutralized with 0.2 M Tris pH 7. Denatured libraries were then diluted down to 1.5 pM, 1% PhiX was added, and sequenced on an Illumina NextSeq 550 sequencer for 75 paired end read-cycles at the Arthritis Program's Diagnostic and Therapeutic Innovation Centre (Krembil Research

Institute, Toronto, ON, Canada). Sequencing data sets have been deposited in the gene expression omnibus (GEO) data repository with the accession code GSE133775.

#### *Bioinformatics analysis on RNA sequencing data*

Six paired-end samples belong to two groups: WT or miR-34a-KO. Conversion of bcl to Fastq files was performed for each sample using bcl2fastq conversion tool (v2.19.1.403). Initial quality assessment of each sample revealed that the reads were of high quality ( $> Q30$ ). Cutadapt (v1.18) software was used to maintain minimum read length of 25 bp post trimming of adapters (very few reads being contaminated = 3%) as well as trimming of N's [12]. Splice-aware alignment of reads using a Hierarchical Graph FM index (HGFM) method was performed using HISAT2 software (v2.1.0) with parameters (`--rna-strandness FR -dta`) against mouse reference genome (mm10) [13]. To assemble the aligned reads into transcripts, StringTie software (v1.3.5) was used with parameters (`--rf` assuming it was a stranded library `fr-firststrand`) [14]. To obtain the abundance of each of these transcripts based only on the known reference genome and transcriptome, StringTie was run again using different parameters (`-e -B -G referencetranscripts.gtf`) to generate output of Ballgown software compatible table files. This script was provided by StringTie software named 'prepDE.py', which helps in retrieving raw counts for genes and transcripts separately based on the table files.

#### *Differential expression analysis*

Genes with at least ten counts per million (CPM) in at least two of the six samples were retained for the analysis, leaving 10195 of 24421. A list of differentially expressed genes was obtained using the negative binomial exact test with trended dispersion and a trimmed mean of M-values

(TMM) normalization. The resulting p-values were adjusted for false discovery rate (FDR) using the Benjamini-Hochberg method and significance was set at  $p \leq 0.05$ . The analysis was done in R (v3.6.0) using the edgeR (v3.25.8) package [15]. The heatmaps are the log fold change (FC) relative to the mean of the wild type group in each gene, logFC are calculated using TMM adjusted CPM+1 counts.

*Integrative network of differentially expressed genes identified from RNA sequencing of wild-type and miR-34a knock-out mouse chondrocytes*

Top 1% of predicted targets of hsa-miR-34a-5p and hsa-mir-34a-3p were independently identified using mirDIP (version 4.1) (<http://ophid.utoronto.ca/mirDIP/>). Transcription factor (TF) regulatory network for the nine genes of interest was obtained using data from 15 independent resources (see supplementary table S4), including human TF-target gene associations derived from Chromatin Immunoprecipitation (ChIP) high-throughput experiments, gene regulatory network inference and other predictive algorithms. Protein-protein interactions (PPI) for the resulting network were added by searching Integrated Interactions Network (<http://ophid.utoronto.ca/iid>) ver. 2018-11 [16]. Network was then visualized in NAViGaTOR ver. 3.0.10 [17, 18].

Supplementary Figures:

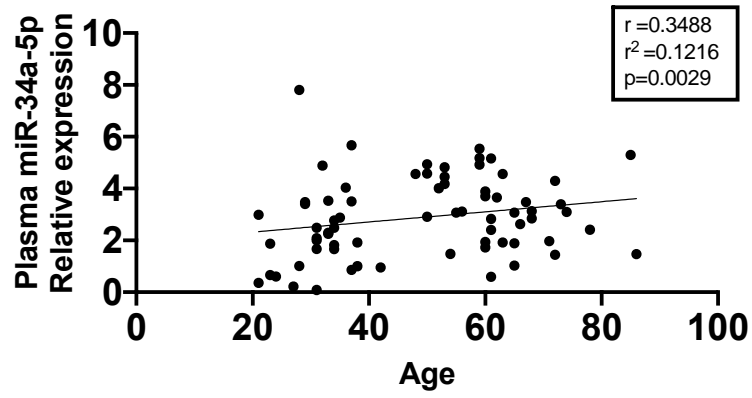

**Fig. S1. Correlation between age and plasma miR-34a-5p expression.** Two-tailed Pearson's correlation showing the relationship between age (TKR and healthy controls) and plasma miR-34a-5p.  $n = 71$ .

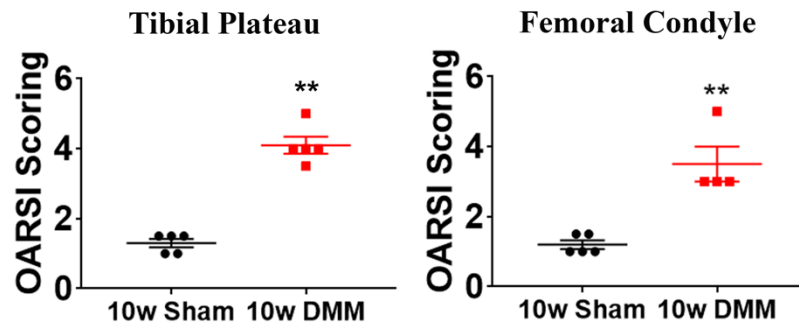

**Fig. S2. Destabilization of the medial meniscus (DMM)-induced OA mouse model.** OARSI scoring of tibial plateau and femoral condyle surfaces of the medial compartment of mouse knees ten weeks post-DMM (n = 4-5) or -sham (n = 5) surgery. Data is represented as mean  $\pm$  SEM and analyzed using Mann-Whitney U tests. \*\* =  $P < 0.01$ .

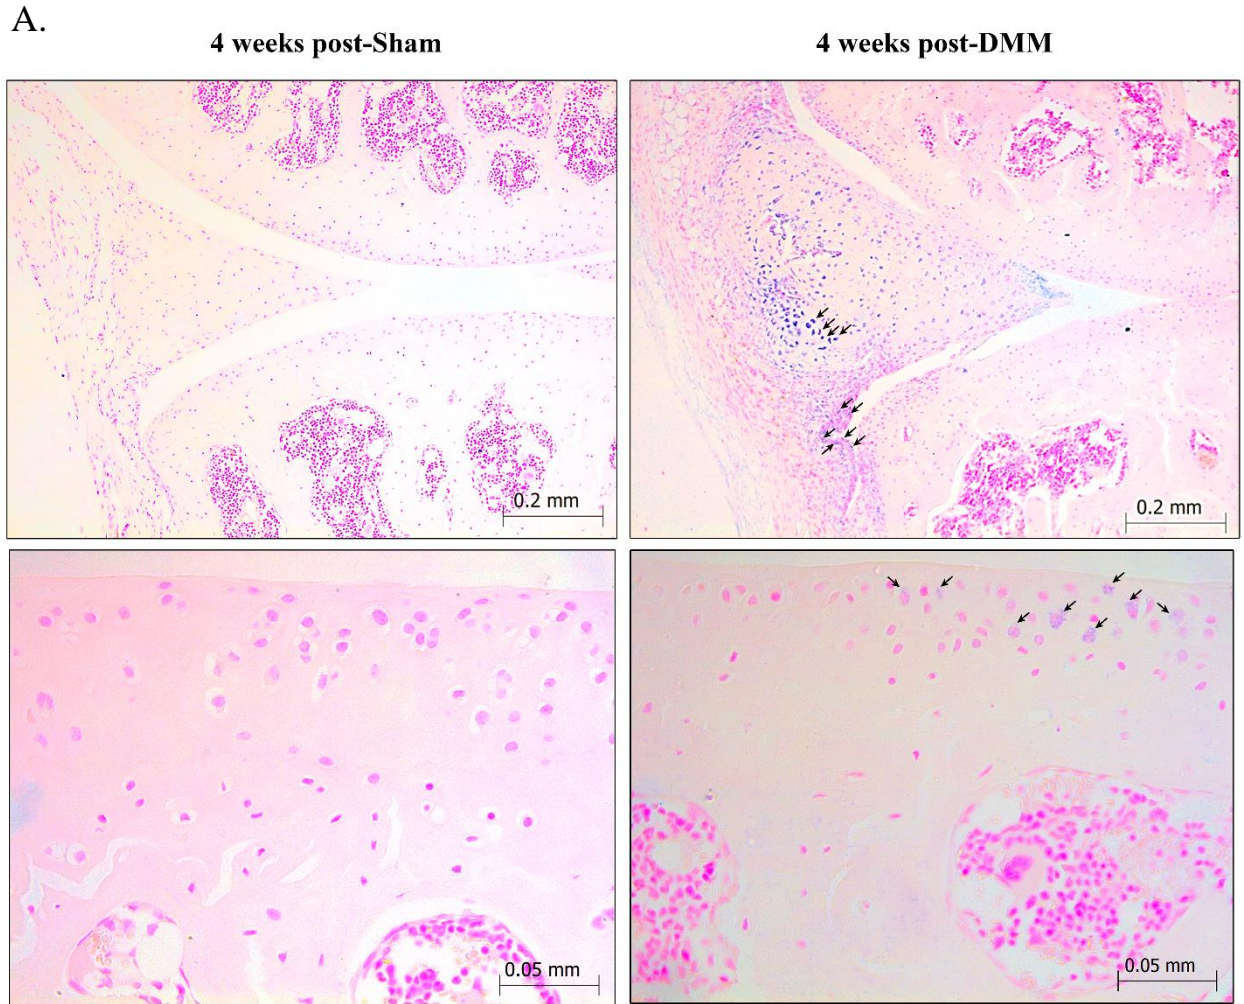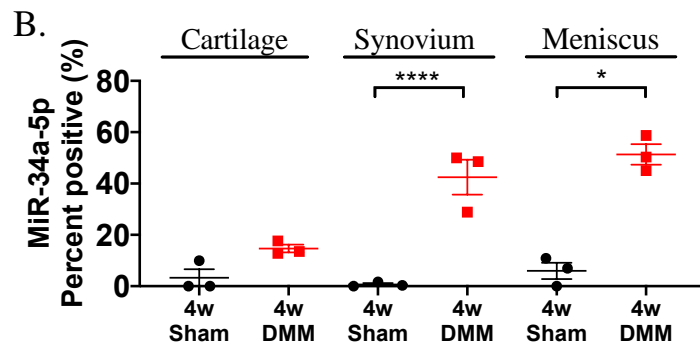

**Fig. S3 In-situ hybridization of mouse knee sections four weeks post-DMM surgery.** (A) Representative ISH images stained with miR-34a-5p probe in knee sections of mice four weeks post-sham or -DMM surgery (n = 3/group) showing the synovium and medial meniscus (top: 10x magnification) and articular cartilage (bottom: 40x magnification). Black arrows indicate miR-34a-5p positively stained cells. (B) ISH quantification of the percentage of miR-34a-5p positively stained cells in mouse knee articular cartilage, synovium and medial meniscus four weeks post-DMM or -sham surgery. Data are represented as mean  $\pm$  SEM and were log-transformed prior to analysis by two-tailed Student's T-test. \* =  $P < 0.05$ , \*\*\* =  $P < 0.001$ .



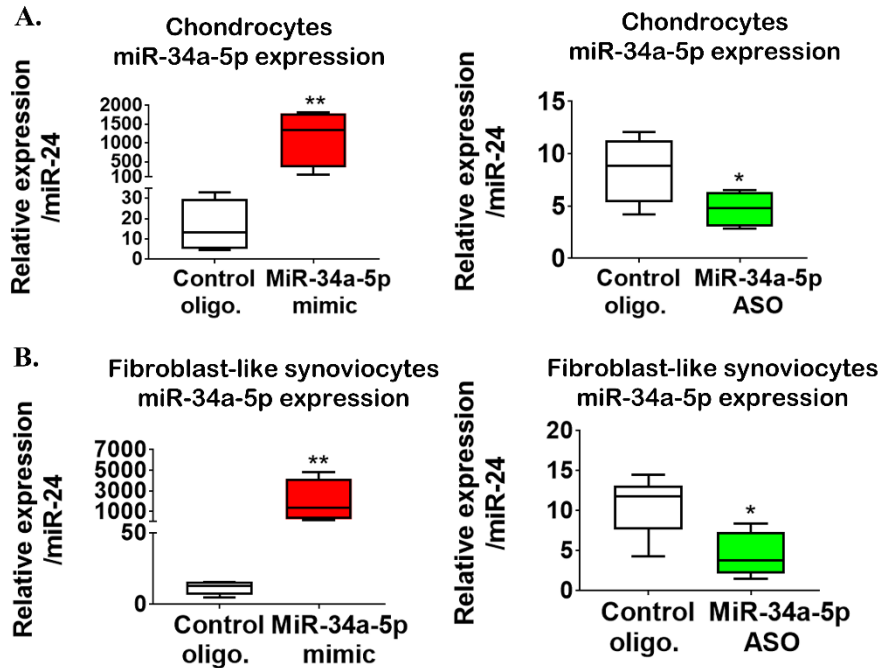

**Fig. S4. MiR-34a-5p mimic and antisense oligonucleotide (ASO) treatment in human knee OA chondrocytes and fibroblast-like synoviocytes (FLS).** (A) Relative expression of miR-34a-5p in human OA chondrocytes treated with 100 nM control oligonucleotide, miR-34a-5p mimic, and miR-34a-5p ASO for 24 h (n = 4). (B) Relative expression of miR-34a-5p in human OA FLS treated with 100nM control oligonucleotide, miR-34a-5p mimic, and miR-34a-5p ASO for 24 h (n = 4). Data are presented as box-and-whisker plots (2.5-97.5 percentile). Data was log-transformed prior to analysis by two-tailed, paired Student's t-test. \* =  $P < 0.05$ , \*\* =  $P < 0.01$ .

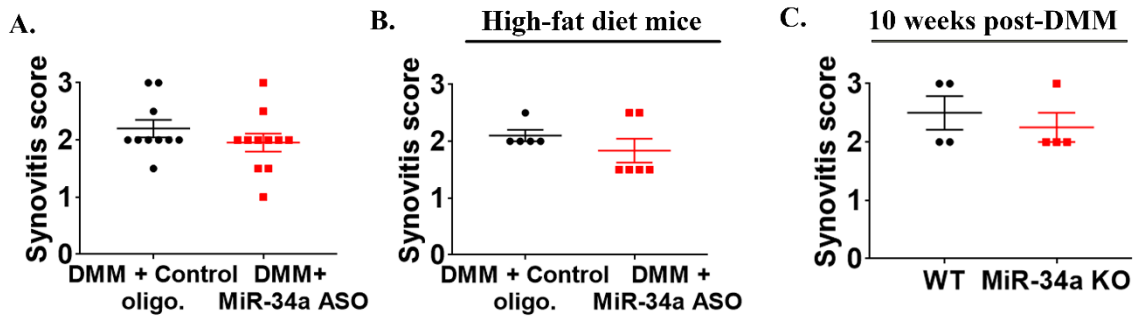

**Fig. S5. Synovitis scores of mice subjected to DMM surgery with miR-34a-5p ASO or control oligonucleotide intra-articular injections.** (A) Degree of synovitis was scored in knee sections from mice subjected to DMM surgery followed by control oligonucleotide (n = 10) or miR-34a-5p ASO (n = 11) intra-articular injections. (B) Synovitis scores in C57BL/6J mice fed HFD for nine weeks and subjected to DMM surgery followed by control oligonucleotide (n = 5) or miR-34a-5p ASO (n = 6) intra-articular injections. (A&B) oligo, oligonucleotide. (C) Synovitis scores of wild-type (WT; n = 4) or miR-34a knock-out (KO) mice (n = 4) subjected to DMM surgery. (A-C) Data are represented as mean  $\pm$  SEM and analyzed using Mann-Whitney U tests.

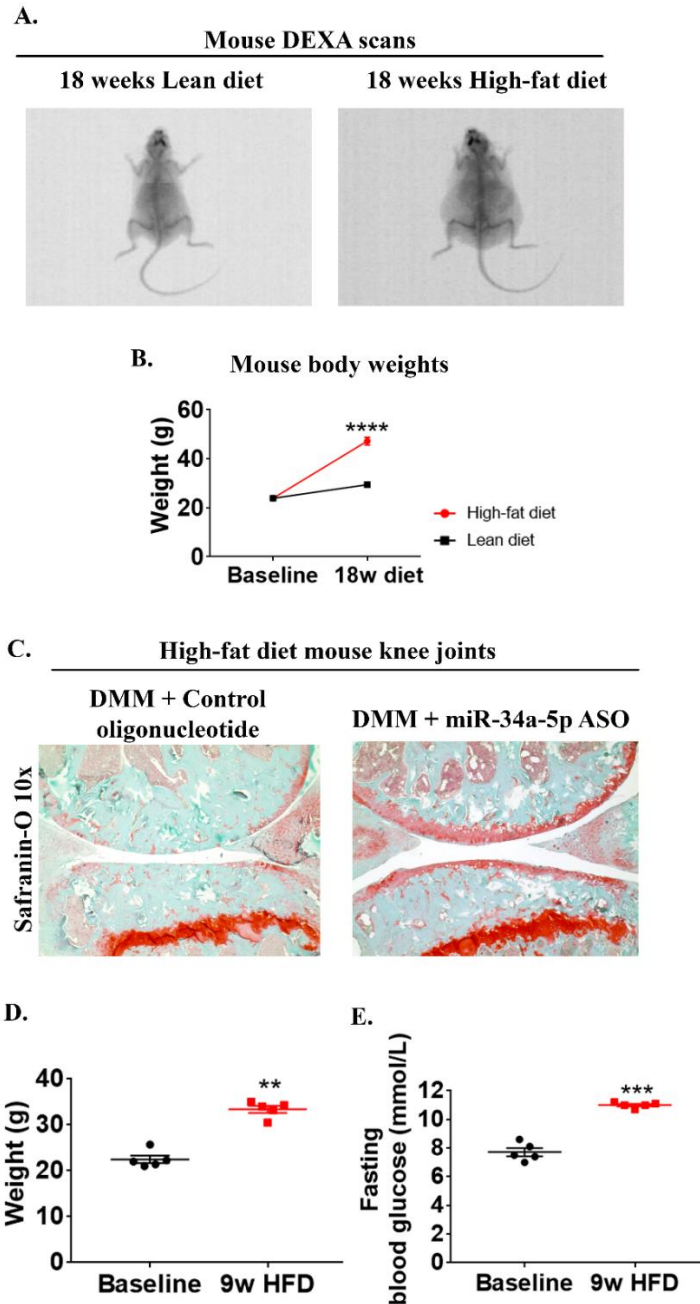

**Fig. S6. Comparison of high-fat diet (HFD)- and lean diet (LD)-fed mice.** (A) Dual-energy X-ray absorptiometry (DEXA) scan of mice fed a LD or HFD for 18 weeks. (B) Average weight of mice at baseline (ten-weeks-old;  $n = 35$ ), and at the end of 18 weeks of HFD ( $n = 18$ ) or LD ( $n = 14$ ). Data represents mean  $\pm$  SEM analyzed using two-way ANOVA and Tukey's multiple comparisons test. \*\*\*\* =  $P < 0.0001$ . (C) Ten-week-old mice were fed a HFD for 18 weeks then subjected to DMM surgery. Mice were injected with control oligonucleotide or miR-34a-5p antisense oligonucleotide (ASO) at two, four, and six weeks post-DMM surgery. Joints were collected ten weeks post-DMM surgery and stained with Safranin-O. (D) Average body weight and (E) fasting blood glucose levels of baseline ( $n = 5$ ) and end of nine weeks HFD ( $n = 5$ ). Data are represented as mean  $\pm$  SEM and analyzed using two-tailed, paired Student's t-test. \*\* =  $P < 0.01$ , \*\*\* =  $P < 0.001$ .

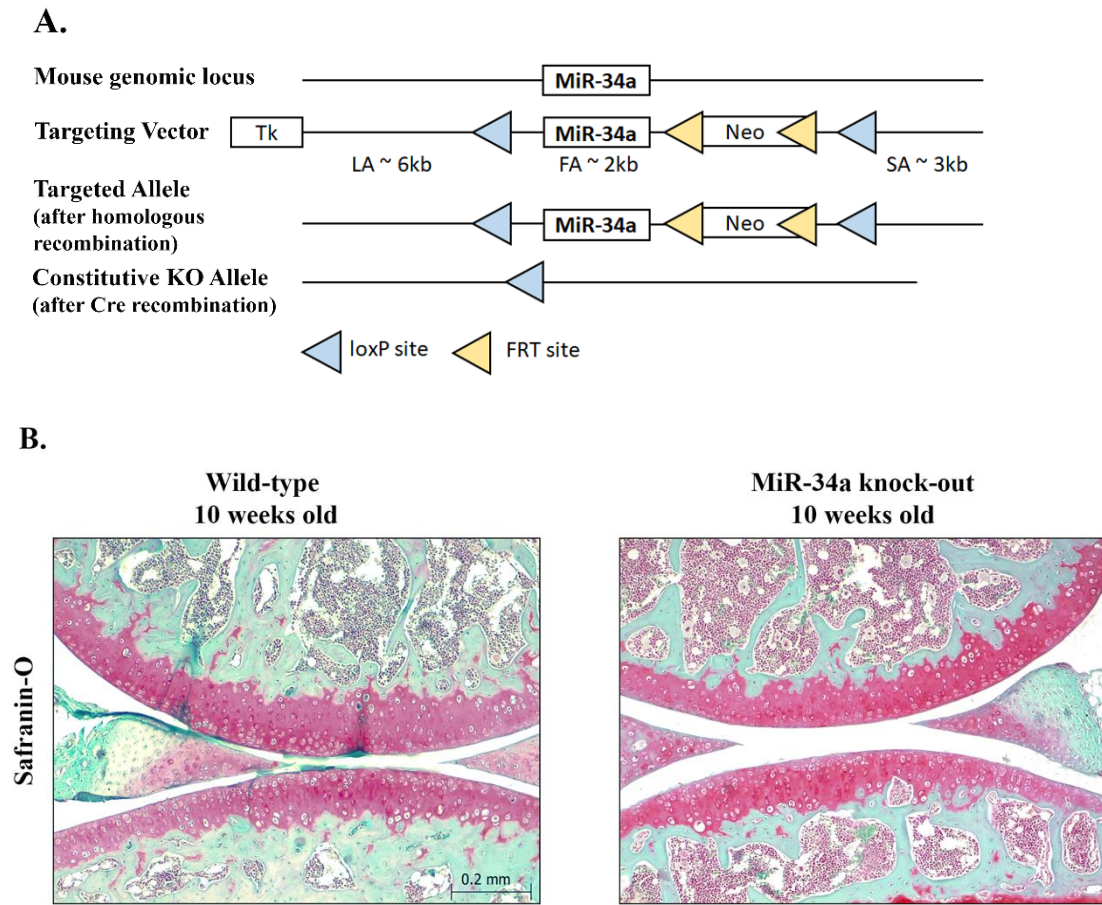

**Fig. S7. Generation of constitutive miR-34a knock-out allele.** (A) The targeting vector was generated using C57BL/6J DNA and transfected into C57BL/6NTac embryonic stem cells. The miR-34a sequence is flanked by LoxP sites. The constitutive knock-out (KO) allele was generated after Cre-mediated recombination by crossing chimeras to a Cre-Deleter on a C57BL/6 background. The constitutive KO line was subsequently backcrossed to C57BL/6NTac animals for at least two generations and the Cre-transgene was removed by segregation. SA, short arm of homology; FA, floxed arm of homology; LA, long arm of homology. (B) Representative images (10x magnification) showing Safranin-O staining of the medial knee compartment of ten-week-old wild-type (WT) and miR-34a-KO mice.

## Supplementary Tables:

**Table S1A. Demographics of healthy controls and TKR patients.**

| Subjects         | Healthy controls     | OA (TKR)            |
|------------------|----------------------|---------------------|
| N                | 34                   | 37                  |
| Mean BMI [95%CI] | 23.25 [21.52, 24.97] | 29.7 [27.7, 31.78]  |
| Mean age [95%CI] | 33.5 [30.46, 36.45]  | 62.3 [59.38, 65.22] |
| Age range        | 21-63                | 44-86               |
| % Female (N)     | 52.9%                | 51.4%               |

TKR, Total Knee Replacement; BMI, body mass index

**B. Demographics of TKR patients stratified according to BMI.**

| Subjects         | Non-obese OA (TKR)                              | Obese OA (TKR)                      |
|------------------|-------------------------------------------------|-------------------------------------|
| BMI              | $18.5 \leq \text{BMI} \leq 29.9 \text{ kg/m}^2$ | $\text{BMI} \geq 30 \text{ kg/m}^2$ |
| N                | 29                                              | 22                                  |
| Mean age [95%CI] | 66.9 [63.62, 70.17]                             | 61.64 [57.36, 65.91]                |
| Age range        | 53-87                                           | 48-86                               |
| % Female (N)     | 44.8%                                           | 50%                                 |

TKR, Total Knee Replacement; BMI, Body Mass Index

**Table S2A. RT-qPCR human primer sequences**

| <b>Gene</b> | <b>Primer sequence (5'-3')</b>                                            |
|-------------|---------------------------------------------------------------------------|
| GAPDH       | Forward- GGAGCGAGATCCCTCCAAAAT<br>Reverse- GGCTGTTGTCATACTTCTCATGG        |
| ACAN        | Forward – ACTCTGGGTTTTTCGTGACTCT<br>Reverse - ACACTCAGCGAGTTGTCATGG       |
| COL2A1      | Forward – ATGCCTGGTGAACGTGGT<br>Reverse - AGGAGAGCCATCAGCACCT             |
| COL10A1     | Forward – TGCCTCTTGTCAGTGCTAACC<br>Reverse - GCGTGCCGTTCTTATACAGG         |
| IL1B        | Forward – TCGCCAGTGAAATGATGGCTTA<br>Reverse - GTCCATGGCCACAACA ACTGA      |
| ULK1        | Forward – AGTCTCAGACGTGCTGGGGA<br>Reverse - CGCATGGCGTGCAGGTAGTC          |
| ATG3        | Forward – GTGAAGGGAAAGGCACTGGA<br>Reverse - CCACAACTCTTCTGGGGT            |
| ATG5        | Forward – CTTCTGGAGTCCTGCTACC<br>Reverse - CAAAGCCAAACCTACTCCAAGC         |
| MMP13       | Forward – TGGAGTGCCTGATGTGGGTGAATA<br>Reverse - TGGTGTACATCAGACCAGACCTT   |
| COL1A1      | Forward- GCTCGTGGAAATGATGGTGC<br>Reverse- ACCCTGGGGACCTTCAGAG             |
| ACTA2       | Forward- ACAGAGTATTTGCGCTCCGGA<br>Reverse - CCGACCGAATGCAGAAGGA           |
| TGFB        | Forward – TGGAAGTGGATCCACGCGCCCAAGG<br>Reverse- GCAGGAGCGCACGATCATGTTGGAC |
| TNFA        | Forward – GTCTCCTACCAGACCAAG<br>Reverse - CAAAGTAGACCTGCCCAGACTCT         |
| IL6         | Forward - TGACAAACAAATTCGGTACATCCT<br>Reverse - TCTGCCAGTGCCTCTTTGCT      |
| ADAMTS5     | Forward – GAACATCGACCAACTCTACTCCG<br>Reverse - CAATGCCACCGAACCATCT        |

**B. RT-qPCR mouse primer sequences**

| <b>Gene</b> | <b>Primer sequence (5'-3')</b>                                   |
|-------------|------------------------------------------------------------------|
| Gapdh       | Forward – AGGTCGGTGTGAACGGATTTG<br>Reverse- GGGGTCGTTGATGGCAACA  |
| Acan        | Forward – GTGGAGCCGTGTTTCCAAG<br>Reverse - AGATGCTGTTGACTCGAACCT |
| Col2a1      | Forward – GGGTCACAGAGGTTACCCAG<br>Reverse - ACCAGGGGAACCACTCTCAC |

**Table S3. Significantly upregulated or downregulated genes in miR-34a knock out (KO) mouse chondrocytes compared to wild-type (WT) as determined by RNA sequencing.**

A. Upregulated genes

| Genes         | logFC    | logCPM   | PValue   | FDR      |
|---------------|----------|----------|----------|----------|
| Tgoln2        | 8.75949  | 4.059792 | 2.78E-15 | 2.84E-12 |
| Hmga1-rs1     | 7.900169 | 3.261005 | 2.16E-09 | 1.16E-06 |
| Gm12669       | 7.354835 | 2.852524 | 6.99E-07 | 0.000183 |
| Bglap2        | 7.173949 | 2.674983 | 2.37E-06 | 0.000493 |
| Fam102a       | 6.988022 | 2.511415 | 7.87E-06 | 0.001295 |
| Ttc8          | 6.965935 | 2.499414 | 8.05E-06 | 0.001295 |
| Bglap         | 6.890872 | 2.46113  | 1.28E-05 | 0.001888 |
| 2510003B16Rik | 6.796461 | 2.352387 | 2E-05    | 0.002678 |
| Zfp365        | 6.732009 | 2.329077 | 2.72E-05 | 0.003377 |
| Clip4         | 6.676399 | 2.262446 | 3.89E-05 | 0.004264 |
| Mrps11        | 6.549517 | 2.183688 | 6.61E-05 | 0.006605 |
| Pparg         | 6.520048 | 2.170288 | 6.69E-05 | 0.006626 |
| Rnf146        | 5.135692 | 7.640111 | 4.77E-36 | 4.86E-32 |
| Prkg2         | 4.629543 | 3.400454 | 3.03E-07 | 9.52E-05 |
| Gm5801        | 4.332627 | 3.168398 | 7.47E-06 | 0.00129  |
| Gnal          | 4.035573 | 6.247594 | 8.82E-24 | 3E-20    |
| Frzb          | 3.343638 | 3.832506 | 6.11E-07 | 0.000168 |
| Galnt13       | 3.277318 | 4.633005 | 4.46E-10 | 2.84E-07 |
| Smpd5         | 3.19463  | 4.204063 | 4.32E-08 | 1.63E-05 |
| Col4a5        | 2.989052 | 3.503157 | 4.85E-05 | 0.005048 |
| Slc8a3        | 2.851776 | 3.538447 | 8.68E-05 | 0.00819  |
| Atp6v0c-ps2   | 2.739682 | 4.096678 | 1.76E-06 | 0.000397 |
| Nrcam         | 2.723062 | 4.129882 | 1.29E-06 | 0.000312 |
| Yipf1         | 2.578583 | 3.275651 | 0.00073  | 0.044054 |
| Fbln7         | 2.419908 | 4.002421 | 3.24E-05 | 0.003796 |
| Srp54c        | 2.416293 | 5.15828  | 1.82E-08 | 7.95E-06 |
| Aldh1a1       | 2.401472 | 4.254395 | 8.06E-06 | 0.001295 |
| Chkb          | 2.391868 | 3.895441 | 6.14E-05 | 0.006257 |
| Pask          | 2.380647 | 3.954556 | 6.33E-05 | 0.006385 |
| 1700001G11Rik | 2.378571 | 5.110302 | 6.06E-08 | 2.06E-05 |
| Chadl         | 2.324164 | 4.096518 | 2.22E-05 | 0.002872 |
| Vps11         | 2.320545 | 4.412448 | 7.47E-06 | 0.00129  |
| Rtl1          | 2.318038 | 7.680827 | 3.21E-11 | 2.52E-08 |
| Slc27a3       | 2.270183 | 3.54245  | 0.000661 | 0.040838 |
| Slco4a1       | 2.255072 | 4.626828 | 3.01E-06 | 0.00059  |

|                |          |          |          |          |
|----------------|----------|----------|----------|----------|
| Grem1          | 2.217332 | 6.516728 | 1.21E-10 | 8.78E-08 |
| Ift81          | 2.200316 | 3.641892 | 0.000636 | 0.040513 |
| Lgi4           | 2.18555  | 5.155609 | 5.3E-07  | 0.000154 |
| Panx3          | 2.181675 | 4.972002 | 1.79E-06 | 0.000397 |
| Epha2          | 2.161097 | 4.803085 | 3.61E-06 | 0.000657 |
| Penk           | 2.13382  | 8.905443 | 5.93E-10 | 3.36E-07 |
| Mfi2           | 2.129317 | 4.582262 | 1.3E-05  | 0.001888 |
| Pcolce2        | 2.042024 | 4.492614 | 3.81E-05 | 0.00422  |
| Cadm1          | 2.029615 | 4.011564 | 0.000307 | 0.022818 |
| Ctsf           | 2.022202 | 4.165655 | 0.000139 | 0.011642 |
| Abcc5          | 2.011536 | 4.29737  | 0.000112 | 0.009778 |
| Reck           | 1.965368 | 5.361049 | 1.2E-06  | 0.000299 |
| Col11a2        | 1.962159 | 5.829499 | 1.21E-07 | 3.97E-05 |
| Gdf10          | 1.956151 | 5.214773 | 3.14E-06 | 0.000593 |
| Chrdl1         | 1.934781 | 4.922994 | 1.67E-05 | 0.002306 |
| C1rl           | 1.915842 | 3.988301 | 0.00063  | 0.040381 |
| Enpp5          | 1.896527 | 4.231671 | 0.000304 | 0.022767 |
| Clpb           | 1.854258 | 4.15826  | 0.000656 | 0.040838 |
| Lrig3          | 1.828539 | 4.617036 | 0.000112 | 0.009778 |
| 1700047117Rik2 | 1.791442 | 5.300303 | 2.02E-05 | 0.002678 |
| Lect1          | 1.732757 | 6.569086 | 3.08E-07 | 9.52E-05 |
| Col9a2         | 1.721836 | 5.018679 | 8.93E-05 | 0.008221 |
| Ibsp           | 1.697349 | 11.07148 | 1.62E-06 | 0.000374 |
| Trabd2b        | 1.685957 | 4.437571 | 0.000602 | 0.039113 |
| Gclm           | 1.676706 | 4.680961 | 0.000315 | 0.023282 |
| Itgbl1         | 1.674324 | 5.944261 | 3.39E-06 | 0.000629 |
| Serpina3n      | 1.639572 | 7.658592 | 1.07E-06 | 0.000274 |
| Hs6st2         | 1.58413  | 5.614498 | 3.15E-05 | 0.003777 |
| Maoa           | 1.580225 | 4.957702 | 0.00035  | 0.025537 |
| Smoc2          | 1.568052 | 5.602748 | 3.42E-05 | 0.003939 |
| Adgrg2         | 1.557568 | 4.648699 | 0.000811 | 0.047791 |
| Grb14          | 1.531473 | 4.842518 | 0.000613 | 0.039526 |
| Tmem80         | 1.526997 | 5.421867 | 9.7E-05  | 0.008679 |
| Col27a1        | 1.460956 | 5.752476 | 7.62E-05 | 0.007331 |
| 4931440P22Rik  | 1.446902 | 5.022847 | 0.000716 | 0.043476 |
| Lmo7           | 1.416043 | 5.65477  | 0.000158 | 0.012812 |
| Arvcf          | 1.400537 | 5.215053 | 0.000658 | 0.040838 |
| Fmod           | 1.374914 | 8.41215  | 4E-05    | 0.004293 |
| Pcdh7          | 1.346889 | 5.544323 | 0.000358 | 0.025537 |
| Ephx1          | 1.331256 | 6.302652 | 9.44E-05 | 0.008518 |
| Trp53bp1       | 1.309251 | 8.247309 | 8.76E-05 | 0.008195 |
| Pi15           | 1.298719 | 6.687103 | 9.24E-05 | 0.008413 |
| Acan           | 1.29392  | 7.203675 | 0.000117 | 0.010011 |



|               |          |          |          |          |
|---------------|----------|----------|----------|----------|
| Inpp1         | 1.268429 | 5.780192 | 0.000481 | 0.032493 |
| Edil3         | 1.257399 | 6.821626 | 0.000166 | 0.013204 |
| 4930539J05Rik | 1.222059 | 5.728889 | 0.000789 | 0.047311 |
| Htra4         | 1.193831 | 6.120367 | 0.000519 | 0.033895 |
| Zwilch        | 1.192474 | 6.711074 | 0.000356 | 0.025537 |
| Mme           | 1.13881  | 7.327858 | 0.000647 | 0.040838 |

N=84; P-values were adjusted for false discovery rate (FDR) using the Benjamini-Hochberg method and significance was set at 0.05, FC, fold change; CPM, counts per million.

## B. Downregulated genes

| Genes         | logFC    | logCPM   | PValue   | FDR      |
|---------------|----------|----------|----------|----------|
| S100a9        | -9.3302  | 6.308791 | 0.000803 | 0.047604 |
| S100a8        | -8.27036 | 9.485282 | 0.00068  | 0.041752 |
| ChkbCpt1b     | -7.29372 | 9.83279  | 0.000691 | 0.042209 |
| Tctn1         | -4.22237 | 8.973312 | 0.000508 | 0.033441 |
| Rn45s         | -4.15975 | 7.001892 | 0.000475 | 0.032295 |
| Lars2         | -3.67346 | 7.871267 | 0.000368 | 0.026044 |
| Mir6236       | -3.52075 | 6.446335 | 0.000409 | 0.028383 |
| Foxp3         | -3.5012  | 6.526689 | 0.000352 | 0.025537 |
| Atg7          | -3.36046 | 10.23306 | 0.000499 | 0.033236 |
| Ccr1          | -3.31266 | 6.756814 | 0.000252 | 0.019341 |
| Rps27rt       | -2.8383  | 5.99482  | 0.000419 | 0.028885 |
| Gm32014       | -2.82255 | 7.283598 | 0.000204 | 0.015891 |
| Ms4a4b        | -2.52191 | 9.184048 | 0.000204 | 0.015891 |
| Mcrs1         | -2.5175  | 5.863051 | 0.000489 | 0.032815 |
| Slc4a5        | -2.45438 | 6.664831 | 0.00015  | 0.012297 |
| 6430706D22Rik | -2.44715 | 5.761548 | 0.000504 | 0.033379 |
| Gm10578       | -2.42321 | 6.263641 | 0.000182 | 0.014418 |
| Rab39b        | -2.40486 | 7.127991 | 0.000107 | 0.009505 |
| Plcx1         | -2.39449 | 5.397831 | 0.00083  | 0.048411 |
| Aldh1a2       | -2.36391 | 6.919169 | 8.95E-05 | 0.008221 |
| Pf4           | -2.35432 | 6.229226 | 0.00014  | 0.011642 |
| Gm12191       | -2.28939 | 6.156943 | 0.000131 | 0.011146 |
| Ogg1          | -2.20616 | 8.364701 | 7.12E-05 | 0.006912 |
| Has2os        | -2.16908 | 6.573381 | 5.64E-05 | 0.005809 |
| Rasgrp4       | -2.16775 | 5.654402 | 0.000292 | 0.022053 |
| Sfrp1         | -2.14844 | 5.642606 | 0.000267 | 0.020287 |
| Invs          | -2.13519 | 7.253673 | 4.17E-05 | 0.004426 |
| Nxpe5         | -2.03969 | 7.821402 | 3.44E-05 | 0.003939 |
| Zcwpw1        | -2.02496 | 5.234272 | 0.000656 | 0.040838 |

|               |          |          |          |          |
|---------------|----------|----------|----------|----------|
| Ms4a6b        | -1.9839  | 5.666381 | 0.00014  | 0.011642 |
| Trmt2a        | -1.95549 | 6.235121 | 3.07E-05 | 0.003729 |
| H60b          | -1.89362 | 6.913459 | 1.71E-05 | 0.002331 |
| Sorbs2os      | -1.87762 | 6.03557  | 3.58E-05 | 0.004038 |
| Cnn1          | -1.85707 | 7.706701 | 1.33E-05 | 0.001912 |
| Fbn1          | -1.8456  | 7.579989 | 1.28E-05 | 0.001888 |
| E130310I04Rik | -1.82316 | 6.210745 | 2.23E-05 | 0.002872 |
| Cxcl14        | -1.78263 | 7.824215 | 1.10E-05 | 0.001677 |
| Col4a2        | -1.71915 | 5.466582 | 0.000164 | 0.013136 |
| Zfp704        | -1.71261 | 8.385137 | 8.42E-06 | 0.00132  |
| Ifi27l2a      | -1.70667 | 7.750156 | 8.13E-06 | 0.001295 |
| Zranb3        | -1.68066 | 7.62465  | 7.59E-06 | 0.00129  |
| Ica1l         | -1.66833 | 5.075756 | 0.000406 | 0.028322 |
| Cenpe         | -1.6503  | 6.74376  | 4.90E-06 | 0.000877 |
| Bvht          | -1.64531 | 5.621604 | 3.60E-05 | 0.004038 |
| Hells         | -1.62281 | 6.827928 | 3.11E-06 | 0.000593 |
| Zdhhc17       | -1.58642 | 6.385646 | 2.84E-06 | 0.000567 |
| Il4ra         | -1.56451 | 4.428661 | 0.000831 | 0.048411 |
| Mylk          | -1.53362 | 6.397104 | 1.34E-06 | 0.000318 |
| 5031434C07Rik | -1.5275  | 6.038993 | 2.83E-06 | 0.000567 |
| Proz          | -1.51026 | 4.955604 | 0.000154 | 0.012544 |
| Postn         | -1.49925 | 4.305467 | 0.000794 | 0.047311 |
| Acta2         | -1.49657 | 6.726456 | 5.80E-07 | 0.000164 |
| Mrc1          | -1.49605 | 6.795132 | 3.73E-07 | 0.000112 |
| Eif3j1        | -1.48715 | 4.887691 | 0.000116 | 0.010011 |
| Nt5dc2        | -1.47502 | 5.13343  | 2.38E-05 | 0.003028 |
| Hist1h2bm     | -1.46584 | 5.552964 | 2.00E-06 | 0.000426 |
| 1700071M16Rik | -1.46386 | 8.042863 | 4.95E-08 | 1.74E-05 |
| Vcan          | -1.45883 | 4.368721 | 0.000211 | 0.016266 |
| Il1rn         | -1.44033 | 6.884383 | 3.03E-08 | 1.19E-05 |
| Ap3m1         | -1.44004 | 4.162874 | 0.000357 | 0.025537 |
| Col4a1        | -1.43829 | 7.703557 | 9.26E-09 | 4.49E-06 |
| Abi3          | -1.42112 | 4.62415  | 3.20E-05 | 0.003796 |
| Sgpp2         | -1.396   | 6.071081 | 1.52E-08 | 7.04E-06 |
| LOC100503496  | -1.38988 | 4.361326 | 6.83E-05 | 0.006696 |
| Gse1          | -1.37393 | 7.085237 | 5.77E-10 | 3.36E-07 |
| Gpr183        | -1.36595 | 5.674382 | 2.14E-08 | 8.72E-06 |
| 4933400F21Rik | -1.34658 | 5.803115 | 3.00E-09 | 1.53E-06 |
| Angpt2        | -1.33489 | 7.649451 | 2.63E-10 | 1.79E-07 |
| Gm10754       | -1.32574 | 4.242579 | 1.62E-05 | 0.002258 |

|           |          |          |          |          |
|-----------|----------|----------|----------|----------|
| Hist2h2bb | -1.31987 | 4.283601 | 1.02E-05 | 0.001571 |
| Hist1h1b  | -1.30403 | 4.114458 | 2.49E-05 | 0.00314  |
| Gm15910   | -1.30381 | 4.680464 | 6.87E-07 | 0.000183 |
| Rspo2     | -1.29705 | 5.246263 | 1.87E-08 | 7.95E-06 |
| Ptx3      | -1.29486 | 3.744968 | 7.88E-05 | 0.007505 |
| Trim59    | -1.26994 | 3.919743 | 2.76E-05 | 0.003385 |
| Far1os    | -1.26509 | 4.038744 | 1.45E-05 | 0.002055 |
| Pgm3      | -1.2534  | 3.880643 | 4.64E-05 | 0.004882 |
| Akap12    | -1.25243 | 3.428301 | 0.000442 | 0.030221 |
| Exosc9    | -1.25122 | 3.825967 | 4.00E-05 | 0.004293 |
| Fam196b   | -1.24751 | 3.219463 | 0.000405 | 0.028322 |
| MyI9      | -1.23682 | 4.394391 | 4.48E-08 | 1.63E-05 |
| Fibin     | -1.21086 | 5.113588 | 5.37E-13 | 4.98E-10 |
| Cyfp1     | -1.19913 | 6.538239 | 3.00E-20 | 5.11E-17 |
| Mast4     | -1.18759 | 6.786184 | 3.13E-21 | 6.39E-18 |
| Hist1h1a  | -1.18102 | 11.8353  | 5.64E-20 | 8.22E-17 |
| Ccdc85b   | -1.1775  | 16.94477 | 5.46E-16 | 6.19E-13 |
| Hist1h1d  | -1.17006 | 18.48052 | 5.53E-18 | 7.05E-15 |
| Saa3      | -1.16316 | 7.956529 | 8.56E-29 | 4.37E-25 |
| Prune2    | -1.15745 | 2.618022 | 1.89E-06 | 0.00041  |
| Mmp3      | -1.14874 | 3.483839 | 2.01E-11 | 1.71E-08 |
| lffo1     | -1.13481 | 4.500962 | 1.28E-21 | 3.26E-18 |

N=91; *P*-values were adjusted for false discovery rate (FDR) using the Benjamini-Hochberg method and significance was set at  $P \leq 0.05$ , FC, fold change; CPM, counts per million.

**Table S4. Bioinformatic Resources used for network integration and visualization**

| <b>Data</b>  | <b>First PMID</b> | <b>Date downloaded</b> |
|--------------|-------------------|------------------------|
| AURA         | 22057158          | May 2018               |
| ChEA         | 20709693          | May 2018               |
| CR Cistrome  | 24253304          | April 2018             |
| CTCFBSDB_2.0 | 17981843          | May 2018               |
| ENCODE       | 21526222          | May 2018               |
| GTRD         | 27924024          | June 2018              |
| HmChiP       | 21450710          | May 2018               |
| ITFP         | 18713790          | Aug 2014               |
| JASPAR       | 14681366          | June 2018              |
| MSigDB       | 16199517          | May 2018               |
| Neph et al.  | 22959076          | Feb 2015               |
| PReMod       | 17148480          | May 2018               |
| ReMap2018    | 25477382          | May 2018               |
| TF2DNA       | 25428367          | April 2018             |
| TRED         | 15608156          | August 2014            |

PMID, Pubmed unique identifier

## Supplementary Materials and Methods References

1. Glasson, S.S., T.J. Blanchet, and E.A. Morris, *The surgical destabilization of the medial meniscus (DMM) model of osteoarthritis in the 129/SvEv mouse*. *Osteoarthritis Cartilage*, 2007. **15**(9): p. 1061-9.
2. Zhang, Y., et al., *Cartilage-specific deletion of mTOR upregulates autophagy and protects mice from osteoarthritis*. *Ann Rheum Dis*, 2015. **74**(7): p. 1432-40.
3. Zimmermann, T., et al., *Isolation and characterization of rheumatoid arthritis synovial fibroblasts from primary culture — primary culture cells markedly differ from fourth-passage cells*. *Arthritis Research & Therapy*, 2000. **3**(1): p. 72.
4. Okamura, K., et al., *The regulatory activity of microRNA\* species has substantial influence on microRNA and 3' UTR evolution*. *Nat Struct Mol Biol*, 2008. **15**(4): p. 354-63.
5. Datta, P., et al., *High-fat diet-induced acceleration of osteoarthritis is associated with a distinct and sustained plasma metabolite signature*. *Scientific Reports*, 2017. **7**(1): p. 8205.
6. Jepsen, J.S., M.D. Sorensen, and J. Wengel, *Locked nucleic acid: a potent nucleic acid analog in therapeutics and biotechnology*. *Oligonucleotides*, 2004. **14**(2): p. 130-46.
7. Nakamura, A., et al., *microRNA-181a-5p antisense oligonucleotides attenuate osteoarthritis in facet and knee joints*. *Ann Rheum Dis*, 2019. **78**(1): p. 111-121.
8. Pritzker, K.P., et al., *Osteoarthritis cartilage histopathology: grading and staging*. *Osteoarthritis Cartilage*, 2006. **14**(1): p. 13-29.
9. Alivernini, S., et al., *Synovial features of patients with rheumatoid arthritis and psoriatic arthritis in clinical and ultrasound remission differ under anti-TNF therapy: a clue to interpret different chances of relapse after clinical remission?* *Annals of the rheumatic diseases*, 2017. **76**(7): p. 1228-1236.
10. Thor, T., et al., *MiR-34a deficiency accelerates medulloblastoma formation in vivo*. *Int J Cancer*, 2015. **136**(10): p. 2293-303.
11. Jonason, J.H., D. Hoak, and R.J. O'Keefe, *Primary Murine Growth Plate and Articular Chondrocyte Isolation and Cell Culture*, in *Osteoporosis and Osteoarthritis*, J.J. Westendorf and A.J. van Wijnen, Editors. 2015, Springer New York: New York, NY. p. 11-18.
12. Martin, M., *Cutadapt removes adapter sequences from high-throughput sequencing reads*. 2011, 2011. **17**(1): p. 3.
13. Kim, D., B. Langmead, and S.L. Salzberg, *HISAT: a fast spliced aligner with low memory requirements*. *Nat Methods*, 2015. **12**(4): p. 357-60.
14. Pertea, M., et al., *StringTie enables improved reconstruction of a transcriptome from RNA-seq reads*. *Nat Biotechnol*, 2015. **33**(3): p. 290-5.
15. Robinson, M.D., D.J. McCarthy, and G.K. Smyth, *edgeR: a Bioconductor package for differential expression analysis of digital gene expression data*. *Bioinformatics*, 2010. **26**(1): p. 139-40.
16. Kotlyar, M., et al., *IID 2018 update: context-specific physical protein-protein interactions in human, model organisms and domesticated species*. *Nucleic Acids Res*, 2019. **47**(D1): p. D581-d589.
17. Brown, K.R., et al., *NAViGaTOR: Network Analysis, Visualization and Graphing Toronto*. *Bioinformatics*, 2009. **25**(24): p. 3327-9.
18. Hauschild, A.-C., et al., *Visualization of Biomedical Networks*, in *Encyclopedia of Bioinformatics and Computational Biology*, S. Ranganathan, et al., Editors. 2019, Academic Press: Oxford. p. 1016-1035.
